# Supplementary material for: RETRACTED: Canine Morbillivirus from Colombian Lineage Exhibits In Silico and In Vitro Potential to Infect Human Cells
Source: MDPI journal article supplement (doi:10.3390/pathogens10091199), 2021-09-15
Supplement: s1 [file s1]

Article

# Canine morbillivirus from Colombian lineage exhibits *in silico* and *in vitro* potential to infect human cells

A

|          |                                   |
|----------|-----------------------------------|
| MeV      | SRVEHAVVYYVYSPSRFSYFYPFR          |
| REF      | SRNDHAIVYYVYDPFRTIFYTYPFR         |
| 14COL    | SRNDHAIVYYVYDPIRTISYTYPFR         |
| CYN07-dV | SRGDHAIVYYVYDPFRTISYTYPFR         |
|          | ** : ** : ***** . * * : : * ***** |

B

|          |                                |
|----------|--------------------------------|
| MeV      | EHAVVYYVYSPSRFSYFYPFRLPI       |
| 14COL    | DHAIVYYVYDPIRTISYTYPFRLTT      |
| REF      | DHAIVYYVYDPFRTIFYTYPFRLTT      |
| CYN07-dV | DHAIVYYVYDPFRTISYTYPFRLTT      |
|          | : ** : ***** . * * : : * ***** |

**Supplementary Figure S1. Interaction domain of either MeV or CDV-H protein. A)** Hemagglutinin interaction peptide with SLAM cellular receptor, **B)** Hemagglutinin interaction peptide with Nectin-4 cellular receptor. Alignment was carried out with Clustal Omega form EMBL-EBI (<https://www.ebi.ac.uk/Tools/msa/clustalo/>).

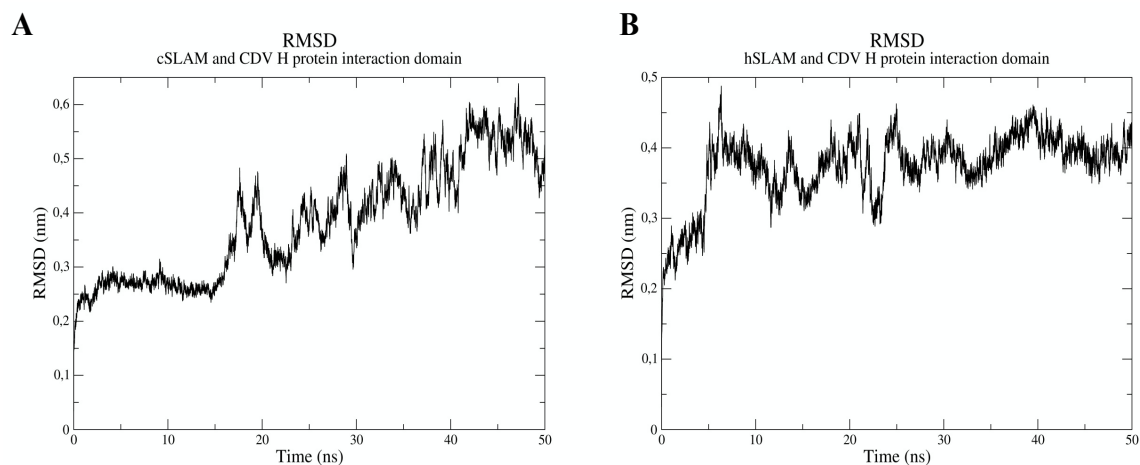

**Supplementary Figure S2.** Molecular dynamic simulations RMSD through the evaluated time. A) RMSD plot of complex of cSLAM and the CDV-H-South-3 interaction peptide. B) RMSD plot of complex of hSLAM and the CDV-H-South-3 interaction peptide.

**Table S1. Identity percentage of modelled proteins and employed templates with PDB number.**

| Proteins to model                                   | Template obtained (#PDB)    | Percentage of identity |
|-----------------------------------------------------|-----------------------------|------------------------|
| <b>CDV-H-South-3</b>                                | <b>MeV-H</b> protein (2RKC) | 34.9 %                 |
| <b>CDV Onderstepoort</b><br><b>(vaccine strain)</b> | <b>MeV-H</b> protein (2RKC) | 34.6 %                 |
| <b>cSLAM receptor</b>                               | hSLAM (3ALX)                | 57.2 %                 |
| <b>cNectin-4 receptor</b>                           | hNectin-4 (4GJT)            | 93.1 %                 |
